# Supplementary material for: Malaria in the Americas: Trends from 1959 to 2011
Source: Am J Trop Med Hyg. 2015 Feb 4;92(2):302–16. doi: 10.4269/ajtmh.14-0368 (PMC4347333; doi:10.4269/ajtmh.14-0368)
Supplement: Supplementary file 1 [file SD2.pdf]

SUPPLEMENTAL TABLE 1. Malaria trend (API) by year and country in the Americas and number of countries with type of trend, 1959–2011.

SUPPLEMENTAL TABLE 2. Slide positivity rate trend for malaria by year and country in the Americas and number of countries with type of trend, 1959–2011.

SUPPLEMENTAL TABLE 3. *Plasmodium vivax* incidence trend for malaria by year and country in the Americas and number of countries with type of trend, 1959–2011.

SUPPLEMENTAL TABLE 4. *Plasmodium falciparum* incidence trend for malaria by year and country in the Americas and number of countries with type of trend, 1959–2011.
